# Supplementary material
Source: PubMed Central journal article supplement (PMC3007193)
Supplement: supp_00229.2010_legend.pdf [file supp_00229.2010_legend.pdf]

**Figure S1.** Oil-red O staining of scrambled and Sepp1-KD adipocytes. Scrambled and Sepp1-KD cells were cultured and induced to differentiate into adipocytes in 10% FBS DMEM supplemented with or without sodium selenite during the entire period of differentiation process.
