# Supplementary material
Source: PubMed Central journal article supplement (PMC3007193)

Supplemental Figure 1

A

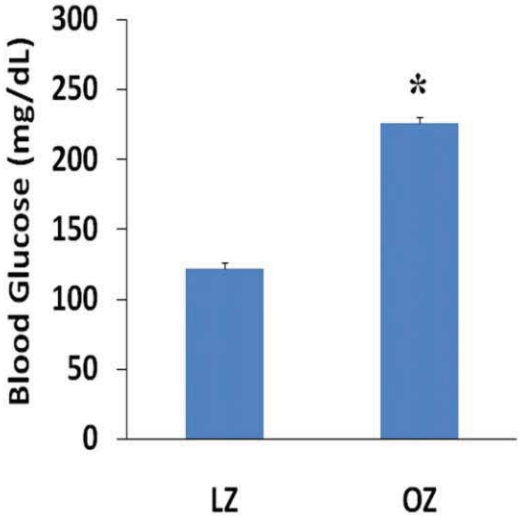

B

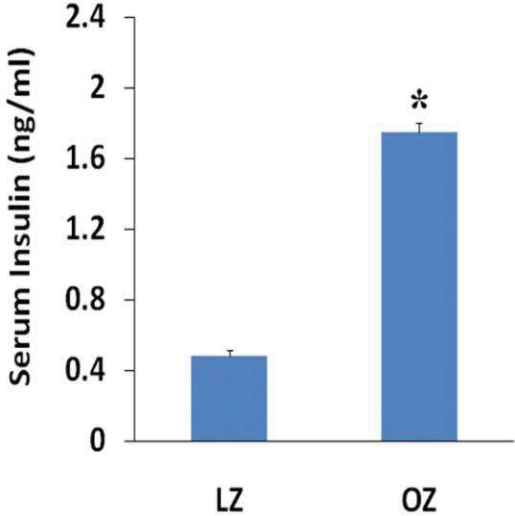

Supplement: supp_00229.2010_figS1.pdf [file supp_00229.2010_figS1.pdf]

Supplemental Figure 2

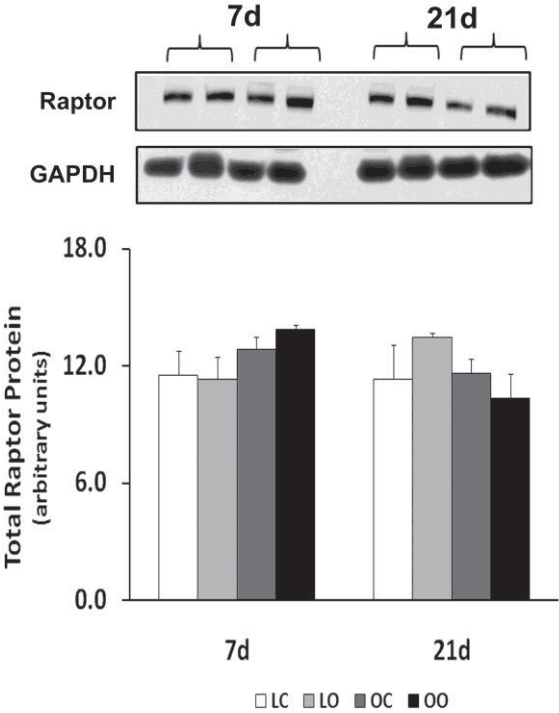

Supplement: supp_00229.2010_figS2.pdf [file supp_00229.2010_figS2.pdf]

Supplemental Figure 3

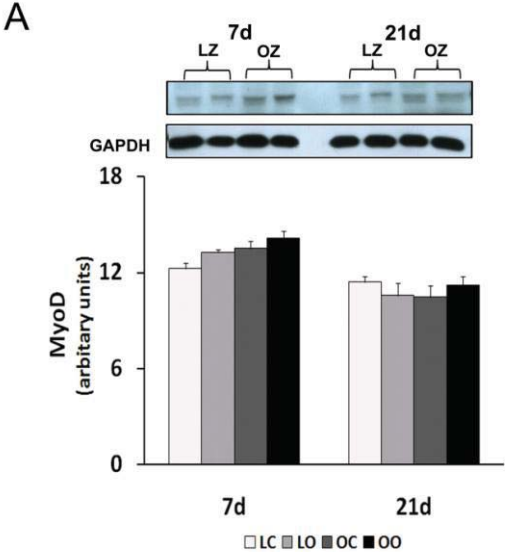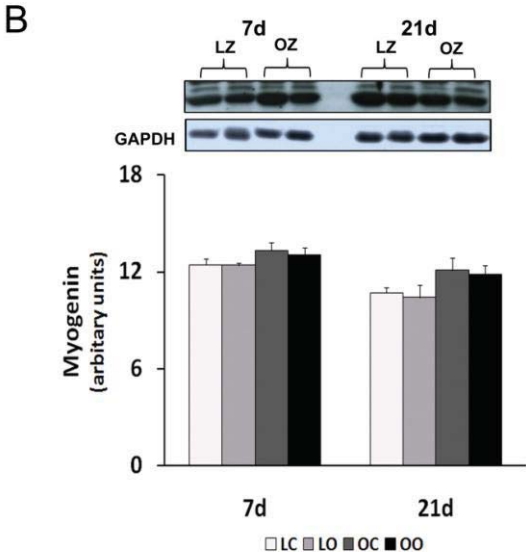

Supplement: supp_00229.2010_figS3.pdf [file supp_00229.2010_figS3.pdf]
